# Supplementary material for: The Sun's Role for Decadal Climate Predictability in the North Atlantic
Source: Copernicus journal article supplement (doi:10.5194/acp-2021-241), 2021-05-12
Supplement: Supplementary file [file acp-2021-241-AC2-supplement.pdf]

## ***Reply to Reviewer 2***

### ***Review of "The Sun's Role for Decadal Climate Predictability in the North Atlantic" submitted by Drews et al. for publication in ACP***

*We thank the reviewer for the comments. Please find our replies below in italics.*

The paper reports on the impact of the solar cycle on decadal predictability of the NAO in the WACCM chemistry climate model. The paper claims that the solar cycle "organizes" and "synchronizes" the decadal-scale component of the NAO. Based on these results, the paper concludes that the solar cycle substantially contributes to "potential predictability" of up to 25% in the North Atlantic, but that the solar influence is limited to decades with sufficiently strong solar cycle amplitudes, such as the second half of the 20th century. The subject of the paper is of relevance and interest for the readership at Atmospheric Chemistry and Physics, and the paper is well written. However, the evidence provided in support of the main two claims (1. the contribution of the solar cycle to predictability, and 2. the impact of the solar cycle amplitude) is not convincing, due to the convoluted and not sufficiently justified methods. Just naming a few examples: 1. the use of ppvf technique to quantify the "predictability", 2. the use of 90% significance level instead of the more standard 95% level, 3. the smoothing of the data, 4. the low and regionally limited significance of the results, etc... Hence, the implications of this paper concerning the potential prediction skill from the solar cycle are over-stated. The authors need to substantially revise some of these claims, perhaps toning them down and/or provide more convincing evidence in support of a robust and detectable solar signal. I also find the discussion rather biased at times. As examples: 1. the signals over the Atlantic are rather regionally very limited and yet the paper makes a big deal out of the small solar signals, 2. (1000) one THOUSAND years of model data are needed to get a "robust" solar signal (this amount of data means the signal can hardly be useful for decadal prediction...). Hence, I cannot recommend publication in the present form. Extensive revisions are needed, as detailed below.

#### MAJOR POINTS

1. The authors "disentangle" the solar-induced climate response from internal variability, using convoluted and not fully justified statistical methods. First, they show the "potential predictability" (Fig.1a) by using the ppvf technique on the **difference** between FULL and LOWFREQ, divided by the variance in FULL. Further, they smooth the data using an 8-year window, citing Goddard et al., to justify such choice (a paper which by the way does in no way suggest one should use 8 years). This metric does not effectively show the impact of the solar cycle on the variance itself (which is what the authors are after) but rather the relative impact of the solar signal over that of the long-term trends in the solar forcing. A much easier (and more convincing) metric would be the ratio between the variance in FULL and

LOWFREQ. Also, using an 8-year smoothing window to get an 11-year signal seems a very unwise way to filter the data. Why exactly are 8 years used? I suspect the results are sensitive to the window length used to smooth the data, but maybe the authors can prove me wrong.

**Reply:**

*The reviewer mentions a number of points here. For reasons of clarity, we structure our response in bullet points:*

- *The reviewer states that the analysis of the difference between the FULL and LOWFREQ ensembles is a convoluted and not justified statistical method. We would like to stress here that this approach is a standard method used in detection and attribution efforts. We cite “The Detection and Attribution Model Intercomparison Project (DAMIP v1.0) contribution to CMIP6” by Gillet et al. (2016) (reference list at the bottom): “There are two possible frameworks for designing climate model experiments for D&A analysis: the “only” approach, in which simulations are driven with changes only in the forcing of interest, while all other forcings are held at pre-industrial values; and the “all-but” approach, in which simulations are driven with changes in all forcings except the forcing of interest.” (p. 3687). Further it is stated that “[...] to detect the contribution of a particular forcing to observed climate change [...] the “all-but” approach may be best [...]” and shortly thereafter: “For instance, the response to anthropogenic forcing can be diagnosed from planned DAMIP experiments by taking the difference of the historical and historical natural-only experiments, an “all-but” design [...]” (p. 3689). When combining the FULL- and LOWFREQ-ensembles by analysing the difference of the two ensemble means, we directly follow this “all-but”-approach to examine the effect of the 11y solar cycle. Using the ensemble mean extracts the response of the external forcing, so the difference between the ensemble mean of FULL and LOWFREQ is a way to extract the response to the 11-year solar cycle (see the detailed description in the “Methods” section). As described in the Methods section, first, we disentangled the solar cycle component and calculated its variance, then divided it by the total variance to obtain the ppvf. We think that it is a very strong statement by the reviewer that such an approach developed by an international scientific community, used in a large number of peer-reviewed studies, and being an essential element of a model intercomparison project endorsed for CMIP6 is a not fully justified method. Given this background and the fact that the reviewer provides no further reasoning why this method should not be fully justified in her/his opinion, we decide to follow the approach as outlined and described in our manuscript.*
- *When asking for the ratio between the variances in FULL and LOWFREQ, the reviewer assumes that the total variance of the parameters analysed in this study is enhanced by adding an additional external forcing (the 11y solar cycle variability). This is not the case. The total variances of Ts in FULL and LOWFREQ are almost the same for both interannual (Fig.R1a-b) and decadal timescales*

*(filtered by 8-year running mean, Fig.R1c-d), as shown in Fig. R1. The total variance is defined as the variance of all the 10-members of each set (FULL and LOWFREQ, concatenate the 10-members to a large set and then calculate the variance). As stated in our manuscript, the solar cycle forcing rather acts as some kind of (weak) pacemaker, phase-locking (or synchronizing as it is called in Thieblemont et al.) large-scale variability patterns that also exist in the climate system (and its model representation) without external (solar) forcing.*

- *The reviewer states that an 8y-running mean is an unwise filter when analysing the 11y solar cycle. We refer the reviewer to Fig. R2, showing the filter characteristics for running means of different window lengths. About 30% of a signal with periodicity of 11 years - such as approximately the case for the solar sunspot cycle - will pass this filter. For completeness we also add here Fig. R3 showing the solar index smoothed with different window lengths. We originally chose and often use the running mean of 8 years to identify solar cycle signals as this filter shows a signal transfer of around 0 for the spectral band from 3-5 years which is the preferred period of ENSO in the used model CESM1(WACCM) (see Marsh et al., 2013). A running mean of shorter window length, e.g., 5 years shows a higher signal transfer rate for a periodicity of 11 years but is also associated with a non-negligible (negative) transfer rate in the ENSO spectrum. Using the 5y running mean would pose a significant risk of misinterpreting ENSO-related signals, especially in the tropical Pacific, as being of solar origin. Of course this argumentation is not necessary anymore once the ensemble mean of FULL, LOWFREQ or the difference between the two is analyzed. In this case, internal ENSO variability in the individual runs should be extensively eliminated by the ensemble averaging. However, given that we see no significant drawbacks of the 8y running mean, we prefer to leave the analysis as is.*
- *The reviewer suspects our ppvf results to be sensitive to the filtering with an 8y running mean. In Fig. R4 of this response letter, we provide the results of the very same analysis of the ppvf after applying a 7y running mean, an 8y running mean (as done in our study), and a 9y running mean. It is obvious that the results agree extremely well with each other, especially over the North Atlantic and surrounding areas. Hence, this point provides no reason either to change anything in our analyses or rephrase our description and interpretation.*
- *Furthermore the reviewer states that the paper of Goddard et al. “does in no way suggest one should use 8 years”. Let us elaborate. Goddard et al. write: “The verification of the temporal information in this framework is provided at different scales: year 1, years 2–5, years 6–9, and years 2–9. This set of temporal smoothing choices may seem somewhat arbitrary, but it represents a small set of cases that can illustrate the quality of the information for different lead times and temporal averaging. [...] The year 2–9 average represents decadal-scale climate [...]” (p.251). An average over forecast lead years 2-9 is an 8-year average. It is true that other averaging intervals are also mentioned and considered possible, however, the specific averaging intervals mentioned in this paper became something like a common practice in decadal climate prediction efforts. We refer the reviewer to a selection of climate prediction studies using this averaging interval (see e.g. Meehl*

*et al., 2014; Kadow et al., 2016; Borchert et al., 2021; Hu & Zhou, 2021; Tian et al., 2021), including the probably most cited decadal prediction study in recent years by Smith et al. (2019).*

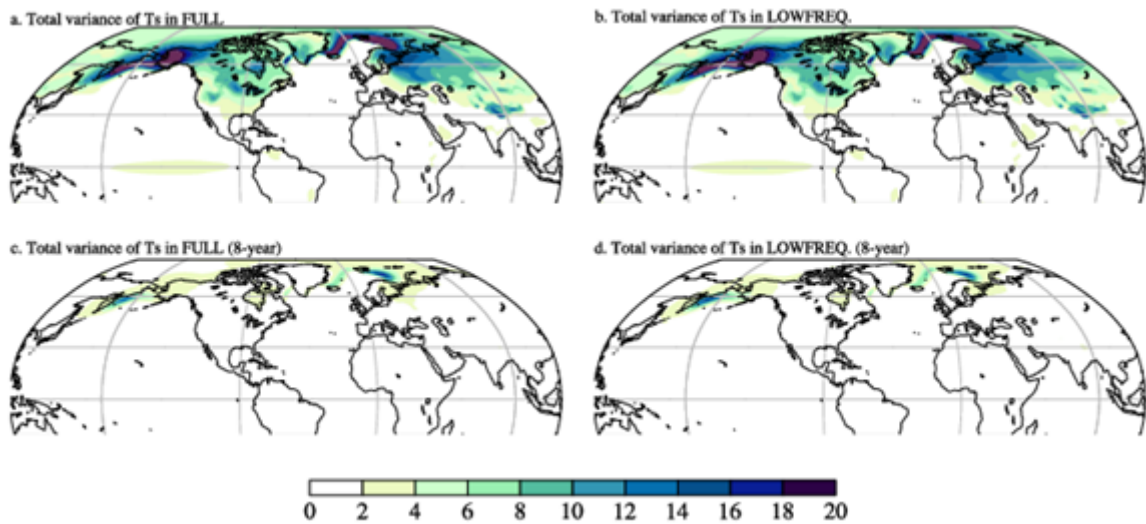

**Fig.R1.** Total variance of DJF mean surface temperature ( $T_s$ ) from 10-ensemble members of (a) FULL and (b) LOWFREQ.; (c) and (d) are same as (a) and (b), but the  $T_s$  is filtered by 8-year running mean.

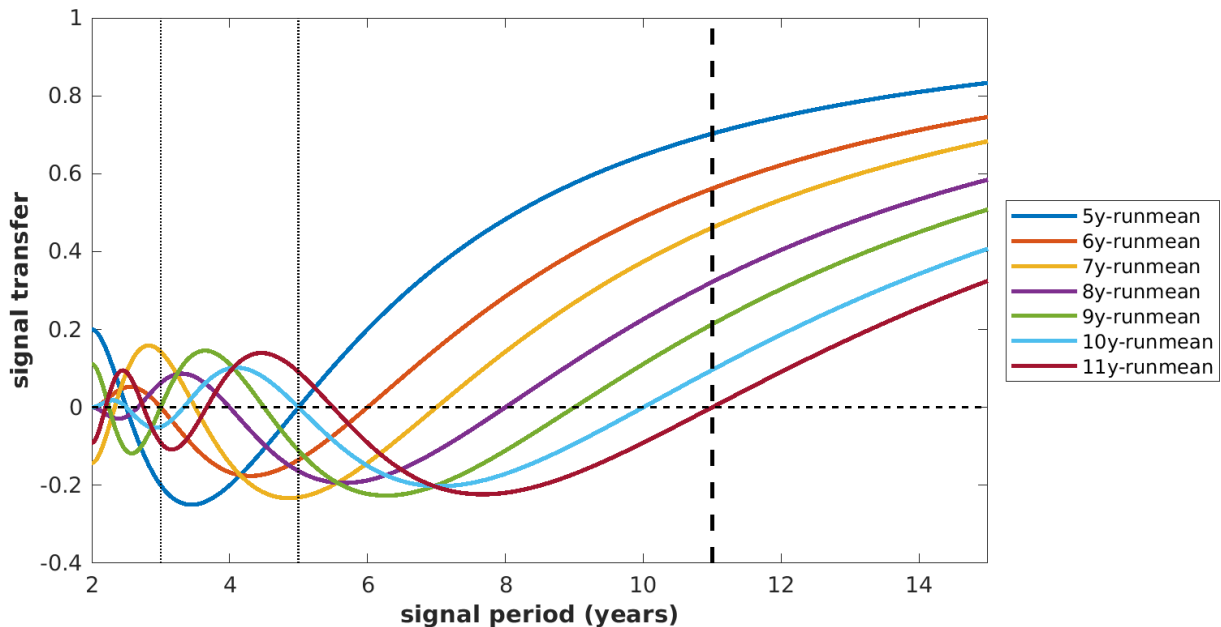

**Fig. R2:** Signal transfer of a sinusoidal signal with a given period for running-mean filters with different window lengths. The thick black dashed line marks a period of 11 years, approximately the period of the solar cycle analysed in our study. The two black dotted lines mark the spectral band from 3 to 5 years for which the power spectrum of ENSO in the CESM1(WACCM) model shows peak values.

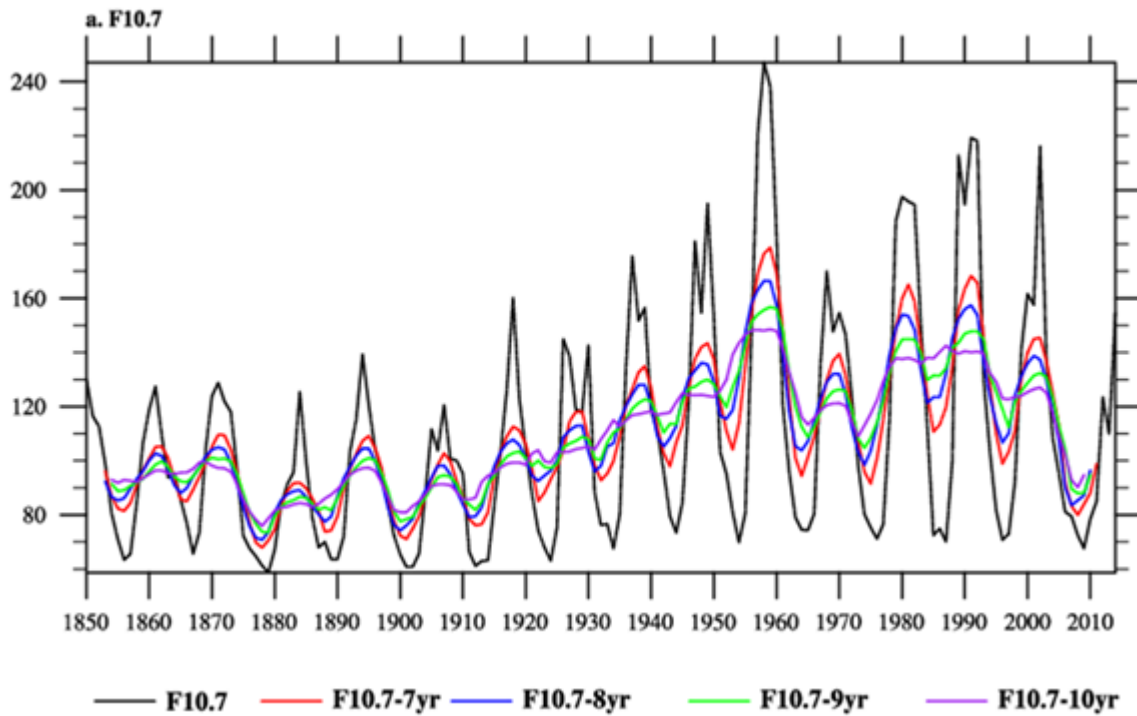

**Fig.R3.** Time series of F10.7 (black) and its running mean with various windows (red: 7-year; blue: 8-year; green: 9-year; purple: 10-year). The 8-year filtered time series exhibits a correlation of 0.78 with the original time series, equivalent to an explained variance of approx. 61% (blue line). (For other running mean windows: (1) 7-year (red line):  $r=0.87$ ,  $\text{var}=76\%$ ; (2) 9-year (green line):  $r=0.69$ ,  $\text{var}=48\%$ ; 10-year (purple):  $r=0.56$ ,  $\text{var}=31\%$ ).

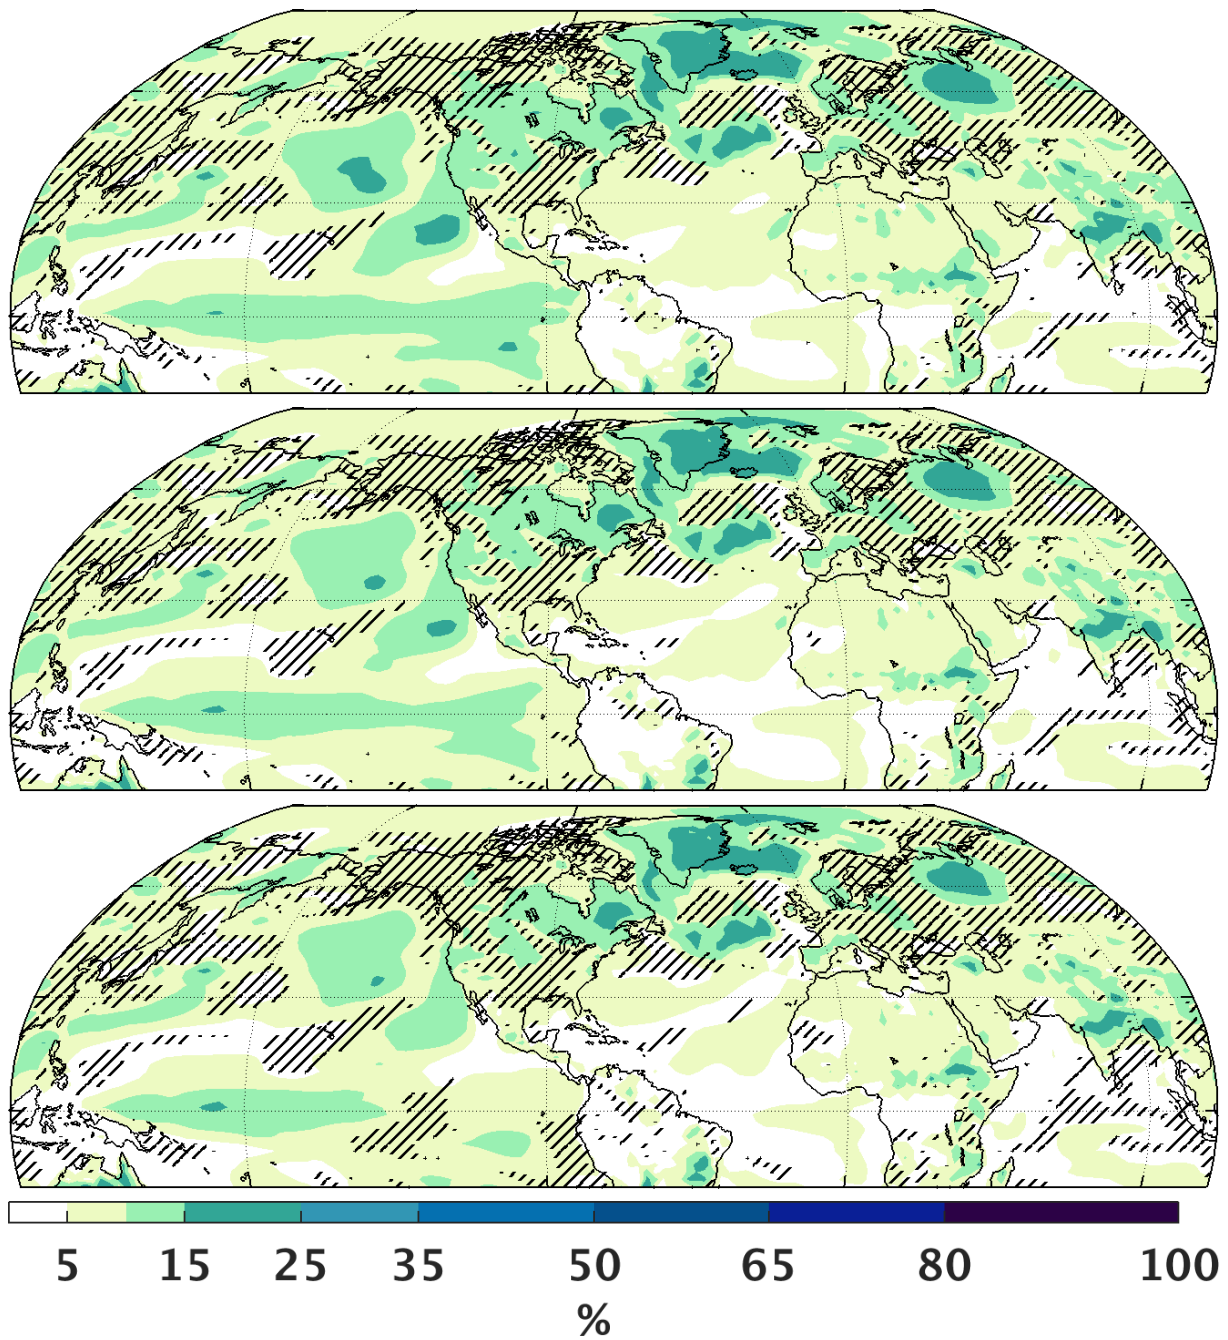

**Fig. R4:** Potential predictability variance fraction (ppvf; explained variance) with respect to the DJF surface air temperature associated with the 11-year solar cycle after applying a 7y running mean (top), an 8y running mean (center; just as provided in Fig. 1a of our manuscript), and a 9y running mean

2. Along the same lines, another line of evidence used in the paper to show a "solar signal" is the running mean correlation over time and against the solar cycle amplitude (Figs.5c-d). But instead of a canonical running mean correlation, we are seeing the correlation (against the solar cycle) of the **difference** between two (independent) ensembles! I find this an utterly confusing and strange metric. Why not simply looking at the running mean correlation itself, rather than the difference of two ensembles? I get it that there are other forcings at work too in the FULL ensemble and that the authors wish to extract the solar cycle component, but the solar signal should emerge from the (forced and unforced) noise... if it's of use for decadal prediction - in the real world, multiple forcings are at work and not only the solar cycle. Looking at the correlation of the ensemble mean itself would highlight how the NAO itself correlates with the solar cycle, rather than its 'solar derived' component (which is supposed to be represented by the FULL-LOWFREQ difference). Physically, it makes little sense to look at the correlation of the difference between two ensembles, if what we're after is quantifying how the solar cycle influences a specific variable.

**Reply:** *As noted above, the signal does not "emerge from noise" when considering the ensembles separately by looking at, e.g., their variances. Changes in the climate system in the period of interest are dominated by anthropogenic climate change and the solar signal cannot properly be extracted if not using methods that are able to extract and enhance the signal such as ensembles and differences between ensembles. It is more or less in parallel to the low-frequency increase of solar irradiance AND the increase of solar cycle amplitude that the anthropogenic influence on climate is becoming more and more important. That's why an approach like ours is necessary and as described above, it is a standard approach used in many detection and attribution studies.*

*Several previous studies that were able to find the solar signal in single model runs used the unrealistically high solar forcing (using data from the Spectral Irradiance Monitor (SIM) instrument on the Solar Radiation and Climate Experiment (SORCE) satellite, which later showed to be too high).*

*Furthermore, we point the reviewer to Figure S3, where we show the correlation of smoothed winter surface air temperatures from FULL and from LOWFREQ with observations (not the correlation of the differences), and the difference of these correlations. This figure gives a direct quantitative estimate of the benefit for decadal climate prediction, using a metric often used in this context. This benefit seen over the North Atlantic is definitely relevant and very positively received in the climate prediction community (personal communication during a number of workshops and conferences).*

*For the figure showing the running correlation of both ensembles separately, see below where Fig. 5c is discussed.*

3. The "emergence" of the solar signal in the strong solar cycle epoch is shown in Fig.5c, but the model vs observations comparison is intrinsically flawed in this figure. First, a different lag is chosen for the model (lag 0) and the obs (lag 0 and 2). The model at 0 lag shows better agreement with the lag 2 in OBS data, so the lag 2 in the model should be compared with the lag 2 in the OBS. Moreover, the observational data (which is a "pure correlation") does not show the equivalent of the FULL-LOWFREQ difference but rather of equivalent of FULL alone, since it contains all the observed forcings... so this is not an apple vs apple comparison! This would be another argument in favor of using the actual running mean correlation in the FULL ensemble rather than of the FULL-LOW difference to show a detectable solar "impact". You could compare the running mean correlation of FULL and should be able to show that it's higher than in LOWFREQ to convincingly demonstrate that the solar signal "emerges" from internal variability (which is the claim of the paper).

**Reply:** Please see below for our detailed reply (discussing Figure 5c).

4. The paper claims that the strong solar cycles organize and even synchronize the decadal-scale component of the NAO. This is an over-statement, which is not sufficiently supported by the evidence provided in the paper. Rather, the paper shows a small influence of the solar cycle over very limited portions of the North Atlantic (Fig.1a) and not over Europe. Also, the solar influence is 2x smaller than the "forced" component (Fig.1b) and of the internal variability (Fig.1c). Can we deem such this a "useful" source of skill, considering that 1000 years of data are needed? Also, the method to extract the solar signal (see major comment 2. above) seems a bit ad-hoc rather than a robust and critical assessment.

**Reply:** The reviewer is right that 1) we show the influence of the solar cycle over parts of the North Atlantic, and 2) that the solar signal is small compared to responses to external forcings elsewhere. We would like to note that 1) our paper is about the solar influence in the North Atlantic, which is where the North Atlantic Oscillation is found, and 2) that even a small signal can be beneficial in decadal prediction efforts. In Figure S3 we show that including the solar cycle increases the correlation with observations (even over Europe even though not as pronounced as over the North Atlantic), which is a typical metric in decadal climate prediction. Also, in Figure 1, surface temperature is shown, whereas we also show the solar surface signal in terms of sea level pressure, and show that an SLP index (the station-based NAO-like index) is organized by the solar cycle. This SLP index has stations over Europe (see Figure 4a), and the associated pattern is not localized to the North Atlantic. Furthermore, regarding the amount of data needed, we would like to note that current climate prediction efforts produce retrospective forecasts (also called hindcasts) consisting of at the very least 10 ensemble members times 5 years of predictions times 55 initializations (a total of 2750 model years) to assess prediction skill (see Boer et al., 2016 for the CMIP6 DCPD protocol). Furthermore, it is common knowledge these days in the climate prediction community that we face the so-called signal-to-noise paradox (see Dunstone et al., 2016, 2018, Scaife and Smith, 2018) when analyzing climate prediction skill. The signal-to-noise paradox describes the fact that "a



*climate model can predict the real world better than itself despite being an imperfect representation of the real world and a perfect representation of itself. Although this highlights a clear deficiency in climate models it also provides an opportunity to create skilful forecasts even with imperfect models by taking the mean of a very large ensemble in order to extract the predictable signal. Where the model signal-to-noise ratio is too small, the number of ensemble members needed to remove the noise and extract the signal will be larger than it would be if the signal-to-noise ratio were correct, and the amplitude of the resulting model predictable signal will be too small. Nevertheless, the ensemble mean signal may be highly skilful if it correlates with the observed variability [...].” (Smith et al., 2019). In other words: Just because we need thousands of model years to detect the signal does not necessarily mean that the respective signal in the real world is so small that we would need thousands of real years to detect it.*

5. The paper essentially rebuts another paper on this subject (Chiodo et al., 2019), but fails to discuss the reasons for the inconsistency. Chiodo et al. used the **same** climate model as this paper (WACCM) and a solar forcing which would qualify as "**strong solar cycle**" forcing **throughout 500 years** (i.e. repetition of the "strong" cycles 19-23). And yet, they found a signal which is time-dependent, much in the same way as Fig.5c of this paper. Hence, the solar cycle amplitude argument does not seem to hold in this study. I urge the authors to more explicitly state this inconsistency throughout the paper (in the abstract AND conclusions) and discuss possible reasons for disagreement, rather than "brushing off" any evidence against their claim, as they do e.g. in L180.

**Reply:** *The reviewer is right that Chiodo et al. used a similar version of the same climate model. However, we discuss slight differences of the model versions in the manuscript, which includes differences in the solar forcing itself. Here we particularly emphasize that the solar forcing for CMIP6 features stronger variability in the UV part of the spectrum compared to the NRLSSI1-forcing used by Chiodo et al.. In this context it is also worth noting that Chiodo et al. do very well find indications of the co-called top-down mechanism, they just state that the signal is too small compared to the large internal variability to be visible in averages over 500 years. When applying an idealized solar forcing featuring unrealistically strong UV variability, they do find a constant and statistically significant strengthening of the NH polar vortex in boreal winter that progresses down to the surface (see Supplement to Chiodo et al., 2019, particularly Sec. B & C as well as Supplementary Figure 11). Besides this stronger UV variability of the solar forcing used for our study, we also include the effects of auroral electrons as parametrized in CESM1(WACCM) via an index of geomagnetic activity. The influence of these particles - called the EPP indirect effect (Randall et al., 2006) - can result in significantly decreased ozone concentrations over the winter pole which may affect the strength of the polar vortex in late winter/early spring similarly as the radiatively induced top-down mechanism. These energetic particles are not at all considered in the experiments analyzed by Chiodo et al.*

Furthermore, we suggested differences in the analysis might be another reason for coming to different conclusions. To be more specific: We see that it is necessary to analyze monthly fields instead of DJF means. In the new version of the manuscript we will add figures of DJF means of zonal mean temperature, zonal mean zonal wind and sea level pressure (Supplement new Figures S11 and S12), which still show signs of the solar signal, but much weaker and not significant.

6. The paper argues about enhanced "predictability", but does not provide actual metrics of enhanced skill scores, when the solar cycle is included in the model predictions. Could the authors show that the model's ACC score values increase during the strong solar cycle epochs? If not, I am afraid that any claims about predictability are not supported and remain pure conjectures.

**Reply:** *The terms predictability and prediction skill are often used synonymously, also in the scientific literature. However, they basically refer to different things. It is nicely put into a single sentence by Boer et al. (2013), writing: "Climate predictability is a feature of the physical system that characterizes its "ability to be predicted" rather than "the ability to predict it" which is characterized by forecast skill." For a number of years it was common practice to assess predictability, or as it was more specifically called "potential predictability" by employing the "perfect model approach". That is the analysis of the ability of a model to predict itself, e.g., calculating a skill score for an ensemble mean predicting one of its individual members. This was historically understood as something like an upper limit of actual prediction skill with the very same prediction system. However, in recent years the climate prediction community learned about the above-mentioned signal-to-noise paradox. This essentially means that this assumption about potential predictability being the upper limit for prediction skill does not hold. Still, model-based potential predictability studies are done to derive some quantitative indication of where the climate system might be more or less predictable and in the context of trying to understand the underlying mechanisms. Anyway, actual prediction skill can be measured of course. And that is what we also provide in our manuscript. We refer the reviewer to Figure S3, which shows ACCs for FULL and LOWFREQ and the difference between them. This is a standard measure of deterministic verification used in decadal climate prediction. This fact is also discussed in our manuscript, saying: "This is further supported by Figure S3 when comparing the "skill" (correlation with observations) of FULL and LOWFREQ for the North Atlantic region. Consequently, solar variability and an adequate representation of its impact on climate is key to exploit the solar-induced potential predictability for decadal climate predictions." (lines 70-73 of the original submission). A comparison to the weak epoch analyzing a potential increase of the skill score as requested by the reviewer is not feasible as there are no observations of comparable reliability for this earlier period (before 1940).*

## SPECIFIC ISSUES

L37 this is an over-statement. Given the problems outlined above, I find it hard to believe this is "robust evidence of solar influence". The solar influence is still minimal, so at very least, change this to "albeit small compared to internal variability" or something similar.

*Our interpretation regarding the robustness and value of these findings differs from the reviewer's opinion, however, we added the following sub-clause: "which is small but non-negligible compared to internal variability".*

L40 "relative to other external forcings" --> incorrect statement - other forcings have not been quantified, as you only compare solar against anything else.

*We mean and write: "relative to other external forcings and internal variability", which we consider to be "anything else" as the reviewer states.*

L41 realistic solar forcing --> whether it's realistic is quite debatable, as solar forcing still a reconstruction using statistical models, so please remove the "realistic" word

*First, using a statistical model does not contradict producing a realistic result (here the solar forcing). State-of-the-art models for solar irradiance, such as the NRLSSI2-model (Coddington et al., 2016) and SATIRE-S (Yeo et al., 2014), which were used to produce the solar irradiance forcing recommended for CMIP6, are able to reconstruct solar irradiance (spectral and total) with very high agreement to independent observations. However, we now write "most sophisticated solar forcing dataset".*

*As we have additionally been contacted by Martin Andrews, who reminded us of his paper, we extended and rephrased the whole sentence to "A similar experimental approach has been used by Andrews et al. (2015), however, our simulations are much longer and include the most sophisticated solar forcing dataset currently available for climate models and recommended for CMIP6 (including solar radiative and particle forcing), a well-resolved shortwave radiation scheme, and a comprehensive module for middle atmosphere chemistry modelling."*

L50 extracting an 11-yr signal using an 8-yr smoothing window is risky, as the window is close to the frequency you are interested in. Further, the paper by Goddard et al does not justify the use of 8-yr smoothing for the study of decadal signals. Are the results sensitive to this "smoothing"?

*Please see above (Figs. R2, R3 and associated text) for an elaboration of the effect of the window size. We had originally chosen this window size to eliminate noise and other modes of variability, especially ENSO, hence the window size could not be much smaller when analyzing individual simulations. Additionally, the 8-year smoothing is common in decadal predictions (average of years 2-9).*

L54-55 where is the 25% number coming from? Fig.1 shows signals over quite remote sections of the N.Atlantic rather than Europe itself, and they are a small fraction of internal & forced variances. In any case, results do not seem to support this statement, as the authors haven't consistently shown that solar explains 25% of the decadal variance, but rather of a convoluted metric for the solar signal itself (i.e. the difference in FULL-LOW rather than FULL itself). I would urge authors to clarify how this number is obtained, or tone down this statement.

*To explain where the 25% are coming from, we provide Fig. R5. Here we show the ppvf associated with the 11y solar cycle, exactly as done in Fig. 1a of our manuscript, just zooming in over the North Atlantic and using a different color scale to make it easier to understand where our numbers are coming from. It is clearly visible that the ppvf peaks along the Southeastern coast of Greenland with maximum values in the (color) range of 0.24 to 0.27. That's why we write "up to 25%". For parts of the subpolar gyre, the ppvf exceeds 0.18.*

*The description of these signals as "quite remote sections of the N. Atlantic" given by the reviewer is not comprehensible from our point of view. It is clearly visible in this figure as it is in Fig. 1a of our manuscript that the ppvf associated with the solar cycle is statistically significant over large parts of the North Atlantic and Nordic Seas.*

*We write nothing in the text here about Europe, so we do not understand why the reviewer critically raises this point. Besides, it is also visible in Fig. R5 as well as in Fig. 1a that the ppvf associated with the 11y solar cycle is also significant over several parts of Europe.*

*In this specific sentence, we will adjust "decadal variability" to "decadal variance".*

*We will not discuss the reviewer's claim of our method being convoluted again as we already made clear that this method is standard and widely accepted in the context of detection and attribution studies.*

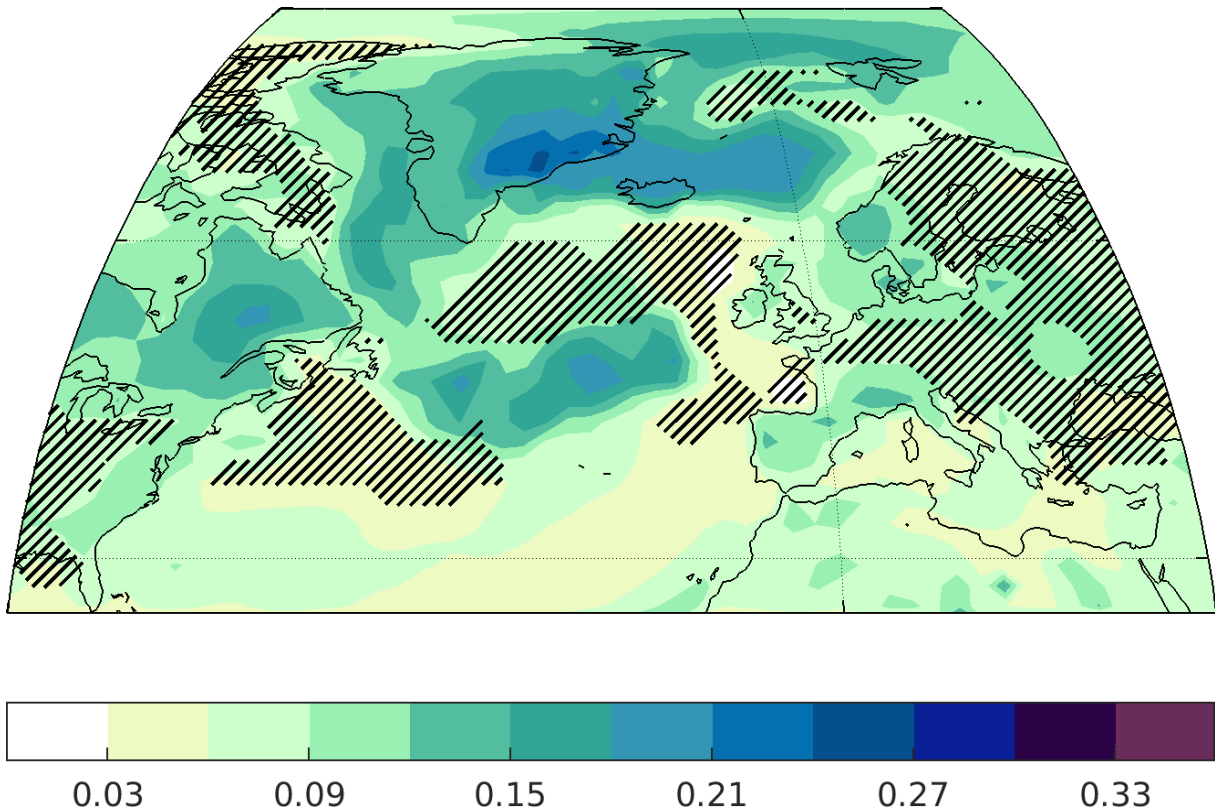

**Fig. R5:** Potential predictability variance fraction (ppvf; explained variance) with respect to the DJF 8-year averaged surface air temperature associated with the 11-year solar cycle; this is exactly what is plotted in Fig. 1a of our manuscript, just zoomed in over the North Atlantic and using a different color scale

55-56 isn't this sentence in complete contradiction with what is stated in previous sentence? If this region is low in terms of predictability, then how can one say solar cycle influence on climate predictability? How is the significance at all quantified?

*We state here that predictability associated with the solar cycle is comparably high in this region, but stemming from other external forcings and from internal variability, the same region shows low predictability.*

*Regarding the significance testing, we refer the reviewer to the Methods section. Our manuscript is written in a letter format, hence, it has a rather short word limit in the main body of the text with the requirement to provide the Methods section at the end of the manuscript.*

Fig.1: how valid is it to disentangle the solar signal using the difference FULL - LOWFREQ? The authors are using a linear estimation for something which is intrinsically nonlinear, as they state. Can we also assume variances in FULL and LOWFREQ are really the same to allow this quantification, or do they change?

To show the impact of the solar cycle on the decadal variability, the authors should rather show the ratios of the variance in LOW vs FULL - this would be easier to interpret and also more convincing evidence for a solar impact rather than the convoluted metric used here  $\text{var}(\text{FULL}-\text{LOW})/\text{var}(\text{FULL})$ . Further, estimating the variance of the difference FULL - LOW over time does not make much sense physically, since it's inconsistent with the physical state of either of the two ensembles.

*Yes, the total variances in FULL and LOWFREQ are almost identical, see the reply to major point 1 above. They are dominated by the global warming signal. There is no linear additivity in the sense that the solar cycle increases the total variance of FULL as compared to LOWFREQ, hence, showing the ratio of variances of LOWFREQ and FULL would not yield anything else but noise.*

*The applicability of the general approach to analyze the difference between FULL and LOWFREQ in the sense of a typical detection and attribution study is already discussed in our answer to major comment 1.*

Fig.1a shows that actually, the decadal predictability is quite limited regionally and does not extend to the European continent. But more generally, how can we get statistical significance on something which is 2x smaller than internal variance? How is the significance level effectively estimated in the ppvf technique?

*Statistically insignificant regions ( $p>0.05$ ) in Fig. 1a and b are estimated by means of a Fisher's f-test, see the "Methods" section.*

*We don't understand why the reviewer considers a ppvf signal over Europe being a criterion for relevance or not. However, significant ppvf values are also evident over several parts of Europe, namely the Iberian Peninsula and France as well as Western Scandinavia. This is very well visible in Fig. 1a of our manuscript and also in Fig. R5 attached to this response letter. Relating this result to a potential direct effect on prediction skill, we once again refer the reviewer to Figure S3 which shows the difference in ACC (a standard deterministic skill metric used in climate prediction) with consistently positive values all over Europe.*

General remark: The ppvf is applied on separate runs, but the technique is not really well known in the climate community... so I would please ask the authors to explain better how they use it. Otherwise, the results will not be reproducible.

*We think that our description in the Methods section (Subsection "Decadal potential predictability") explains in detail how we calculated the ppvf and provide the reference to the study originally introducing this method (Boer, 2004). Following this initial study, the very same approach has been used by several other studies (see e.g. Boer & Lambert, 2008; Boer, 2011; Xu et al., 2020). Therefore, we consider the foundations of this method and our calculation reproducible following the description given in our manuscript.*

Fig.2 - this is a nice schematic, but there is literally nothing new here over e.g. the schematic by Gray et al., 2010 and the ones by Kodera et al. - hence, I frankly do not see the value of this figure and would recommend removing it.

*The reviewer is absolutely correct here and we do not intend to state that we invented something new here. We introduced this schematic to improve readability and reduce text - please be reminded that this manuscript is in a letter format and should be kept short. The schematic allows us to touch on the top-down mechanism only briefly, while reminding readers about it. We would therefore like to keep it. We will add "Inspired by Gray et al., 2010" to the figure caption.*

Fig.3b If the averaging over 10 ensemble members brings out the forced signal, then why is there not corresponding polar vortex strengthening around 1960, which is one of the strongest solar cycles on records? Further, why does the vortex at times even anticipate the solar cycle, such as e.g. at year 1980? Using multiple runs should bring out the signal even in individual cycles... so this should still work at all times!

*We cannot explain the behavior / response of the model during every single cycle as the polar vortex is highly dynamical and the solar forcing is only one component. To make this clearer, we suggest adding the following sentence to the manuscript behind previous line 98: "These numbers demonstrate that the polar vortex is highly dynamical and the solar forcing is only one component influencing it."*

*However, we would like to refer the reviewer to Figure S8. Here we show that the correlation between then F10.7cm solar radio flux index and the ensemble mean for highly dynamical parameters such as the polar vortex strength (indicated by the zonal mean zonal wind at 1hPa, averaged over the latitudinal band 55°N-65°N; Fig. S8b) or the NAO-index (Fig. S8c) is obviously not saturated for an ensemble size of 10 members. Such behaviour is nothing new. Murphy (1990) published a study on this behaviour including an approach to assess the correlation for a theoretical ensemble of infinite size. We also refer the reviewer to the study of Hansen et al. (2017) and particularly their Fig. 3 where they nicely illustrate the dependency of the correlation on ensemble size based on a seasonal prediction ensemble, analyzing NAO predictability. The Decadal Climate Prediction Project (DCPP) of CMIP6 defined 10 ensemble members to be the absolute minimum for participation (Boer et al., 2016), hence this ensemble size became standard for efforts in that context, still it is quite unique for a study based on a complex chemistry-climate model. Given the information about correlation growing with ensemble size, a solar influence with respect to a strengthening of a polar vortex might be detectable for even shorter periods or individual cycles if more members were available.*

Fig.5a What about the phase shifts in individual runs? Why does the sinus curve look shifted in some (2-3) of the runs? This rather hints at a sporadic & random process, rather than a "synchronization"... Also, it does not make much sense physically to compare individual members in FULL against the ensemble mean of LOW, which is a separate ensemble!

*We cannot explain phase shifts of individual runs. For the 2-3 runs mentioned by the reviewer, the correlation at lag -1 year is only slightly higher than for lag 0. Please note that this figure still contains internal variability which is huge for this NAO-like index. It is the overall picture that counts: The members are much better aligned when the 11-year solar forcing is active. And the overall picture might look even better with more members (see reply to comment above).*

*Please note that we are not comparing the members of FULL against the ensemble mean of LOWFREQ, rather, we subtract the ensemble mean of LOWFREQ from the members of FULL in order to remove the signal of external forcing (except 11-year solar cycle) - this is the way we isolate the solar signal (see "Methods" section).*

Fig.5b What about the same calculation, for the individual LOW minus LOW-ensemble mean differences? This panel would be important to evaluate how much the unforced decadal variability itself can originate the apparent "synchronization"!

*As suggested by the reviewer, we plotted the crosscorrelation for the individual members of LOWFREQ, LOWFREQ ensemble mean removed, with the solar cycle, see below. As expected, we do not find any hint of synchronization without the solar forcing.*

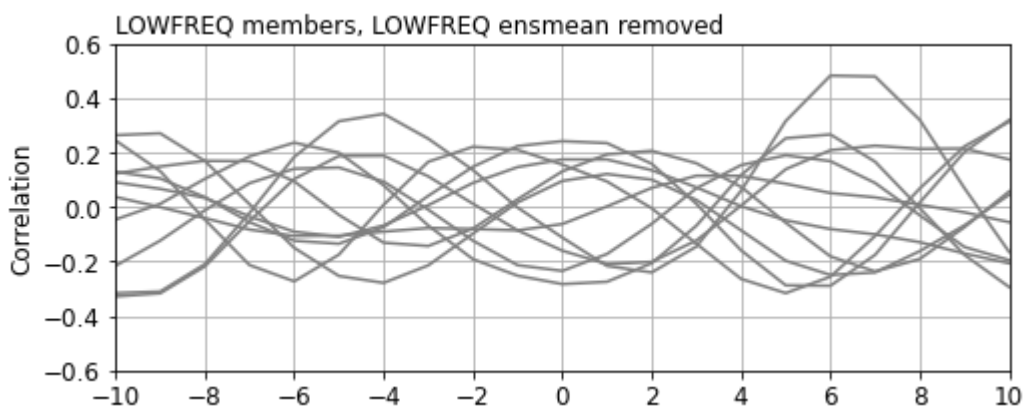

Fig.5c what does "FULL-LOWFREQ" mean? Is this the running mean correlation between the solar index and the difference in the NAO at each year of the simulation, or is this the difference in the running mean correlation in FULL vs LOWFREQ? If the latter is the case, then it's not really a running correlation. I find this method quite convoluted and not fully justified. Why not simply looking at the running mean correlation itself, rather than the difference? This would highlight how the NAO itself correlates with the solar cycle, rather than its 'solar derived' component (which is supposed to be represented by the FULL-LOWFREQ difference)

*It is the running correlation of the solar index and the differences of the ensemble mean NAO indices as explained in the Methods section. We propose to add this info to the figure caption. We argue that we extract the solar signal by subtracting the LOWFREQ ensemble mean for any variable, i.e., here the LOWFREQ ensemble mean NAO index from*



the FULL NAO index so that we get the solar signal in the decadal-scale NAO. Then we correlate this solar-induced NAO with the solar index.

For completeness, we add here the figure of the running correlations of the two ensembles (without subtraction of the LOWFREQ ensemble mean) and for both lags. Indeed we see that the only positive correlation arises in the FULL ensemble at lag 0, however, the LOWFREQ ensemble shows a negative running correlation of similar magnitude. We argue that this is because the solar signal is hard to detect when looking at the full data with all forcings included, hence, one needs to eliminate these other influences by subtracting the LOWFREQ ensemble mean.

That the solar signal is apparently harder to find in the model as compared to observations reminds of the above-mentioned signal-to-noise paradox. This does not mean that the signal is absent in the models - here, we would like to refer to the recent study by Smith et al. (2020) who were able to extract an NAO signal from what looks like model "noise".

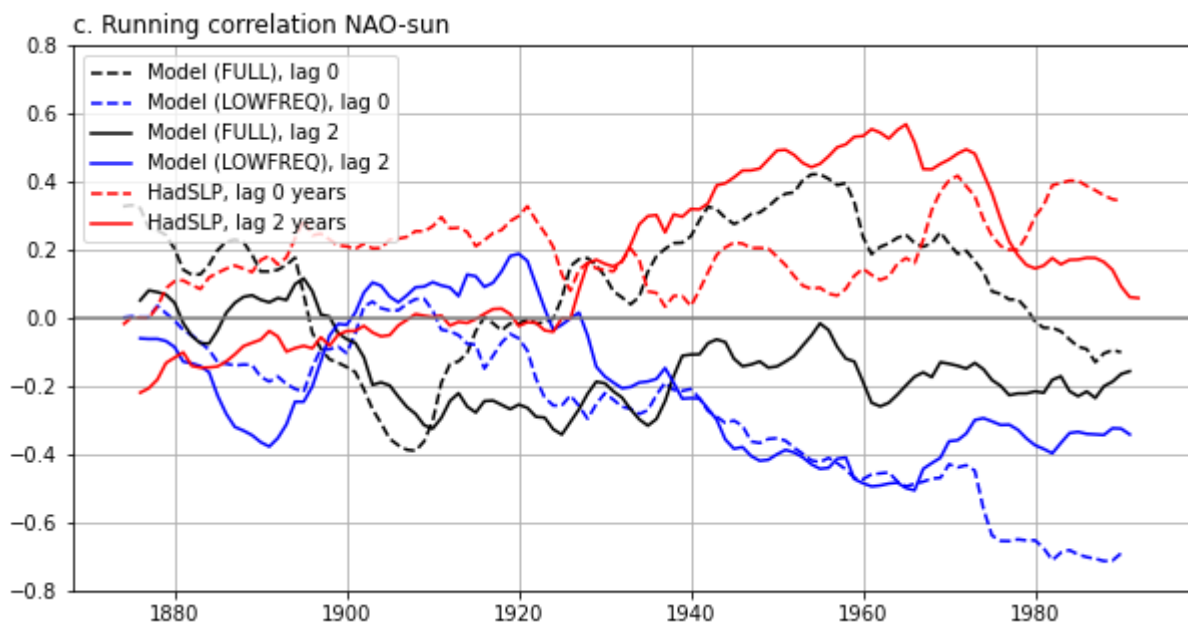

Fig.5c - why is only lag 0 shown for the model and not the lag 2, as done with the observations? The model shows better agreement with the lag 2 in OBS data... so the lag 2 in the model should be compared with the lag 2 in the OBS. Moreover, the observational data does not show the equivalent of the FULL-LOWFREQ difference but rather of FULL alone, so this is not an apple vs apple comparison! This would be another argument in favor of using the actual running mean correlation in the FULL ensemble rather than of the FULL-LOW difference to show a detectable solar "impact". You could compare the running mean correlation of FULL and should be able to show that it's higher than in LOWFREQ to convincingly demonstrate that the

solar signal "emerges" from internal variability (which is the claim of the paper) - see major comment above.

*We agree that our text was a bit unclear regarding the differences in lags in model and observations. We would like to adjust the text the following way: "Their running correlation for all overlapping 45-year windows is fluctuating in the earlier years but begins to rise in the 1920's both for the model (at 0 lag) and observations (with a lag of 2 years) (Fig. 5c)."*

*We would like to note that the 2-year lag has frequently been pointed out in many studies cited here, while the "missing lag" in models is not a new finding either (cf. Gray et al., 2013), and has already been attributed to insufficiencies of the models in ocean-atmosphere coupling (Scaife et al., 2013) - a point that we mention ("[...] (ii) that the model feedback from the ocean is insufficient [...]"*

*See also reply to comment above including the figure in question.*

Fig.5c - why is the dip in the model correlation around year 1900 not captured by the observations? Can the authors speculate?

*We interpret this in a way that during the weak epoch, there is no stable relationship between the solar cycle and the decadal-scale NAO, i.e., the dip occurs just by chance (after all, it is just a dip and not a feature that stays), and there is not necessarily something physically meaningful behind the dip. Furthermore, data quality during the weak period is rather poor.*

Fig.5d - if the running mean correlation is calculated over 45-y windows, then the individual data points are not mutually independent, and this would reduce the degrees of freedom. Is this taken into account in the calculation of the 90% error bar?

*Yes, the significance is tested taking serial correlation into account, see Methods section.*

Fig.5d If the scatter plot is for February, then the main conclusion about the "enhanced decadal-scale component of the NAO under a strong solar cycle forcing" only applies to this month, and not to, as previously argued in the literature, the whole boreal winter. This should be clarified in the abstract.

*In the supplementary Fig. S5 we show that the top-down mechanism with a strengthening of the polar vortex is very well visible in our model throughout November to January, too. The arrival of this signal at the surface is then to be seen in the February mean, according to our model experiments. This is very well in agreement with the common understanding of the top-down mechanism. However, we do not claim that the timing of this arrival is fixed. It is rather the result of interaction with internal variability and the seasonal cycle*

*and it could be slightly different in other models, the month that the signal arrives at the surface, and even the year that the signal is strongest (see above for our replies about the lag). We here trace the propagation using monthly fields and demonstrate that this is necessary to detect and follow the signal. We do, however, not want to state that this is the same for all models or the real world. We could add the following to the abstract: "[...] and that it might be necessary to look at monthly fields instead of winter averages to detect the solar signal at the surface."*

L148 "18% of the magnitude of internal variability" is again, a misleading statement, as the analysis using ppvf does not really quantify the magnitude of the internal variability on a specific time-scale.

*We agree that this sentence is quite misleading as parts of the information got lost during the editing process. What we mean here is that the variance of the solar-induced NAO index is only 19% (we apologize, there was also a glitch here about the correct number) of the magnitude of the variance of the "internal" NAO index (variance of the NAO indices of all 10 members minus the ensemble mean, which is supposed to be internal variability). This can nicely be seen in the following figure which shows all members and the ensemble mean.*

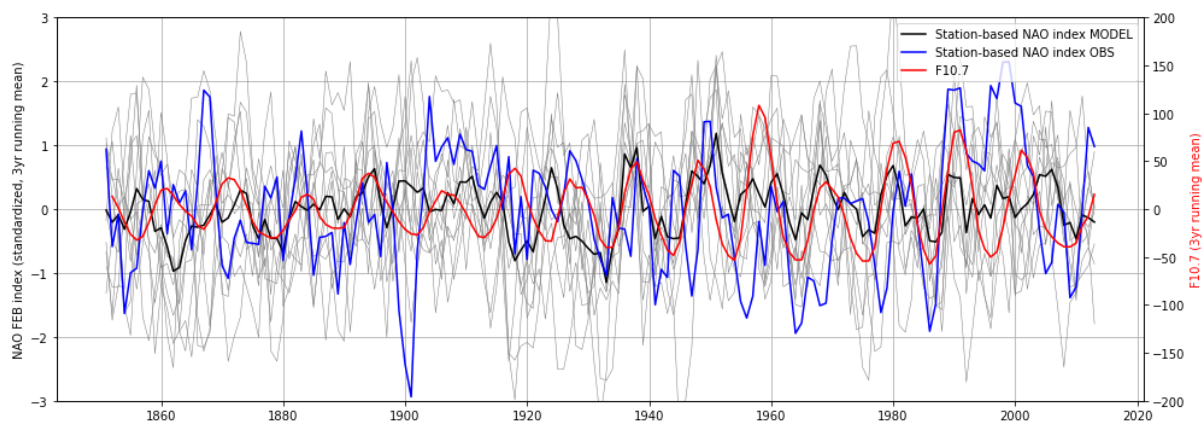

*We propose to extend the sentence in the following way:*

*"A comparison of the solar signal in the NAO with internal NAO variability, by calculating the variances of the smoothed ensemble mean index and those of the smoothed individual members, reveals that the solar signal in SLP over Europe is approximately 19% the magnitude of internal variability during the strong epoch."*

L150 "small in magnitude but manifests itself as an organization and synchronization of internal variability as shown by the cross-correlations" --> the cross correlation is not really a cross correlation in the cleanest statistical sense, but rather an ad-hoc construct designed to isolate the "solar signal" (FULL-LOWFREQ) rather than the solar influence itself. This would be e.g. more convincingly shown by providing evidence that the decadal variance in FULL and LOWFREQ are significantly different.

*As mentioned above, the total variances and decadal variances do not differ in the two ensembles, as they are dominated by the anthropogenic climate change signal. The solar signal is not detectable as an additive variance. We do, however, find it by looking at the phases of the decadal-scale NAO, which is what we show in Figures 5a and b.*

L180 - actually, it's not inconsistent, as the signal is not really significant at the 95% level here either (only at 90% level), which indicates that there's a (non negligible) probability that the signal may be by chance. I think this should be stated here.

*We do not write "inconsistent", we even write that our figure is quite similar to that shown in Chiodo et al. However, we interpret it differently.*

*Also, the choice of the significance level, be it 95% or 90%, is always rather arbitrary. With the 95% level, there is a non-negligible (i.e., 5%) probability for signals arising by chance, too. We state that we used the 90% significance level at several locations in the manuscript.*

L195 "enforces the NAO phase if the solar forcing is strong enough" - this is really hard to believe, as the phase is really not constant over time. Moreover, Chiodo 2019 also used a strong epoch for the solar forcing, and got a time-dependent signal, too. Hence, the authors should at the very least comment on that, and elaborate possible reasons for the disagreement.

*We could rephrase to: "This means the solar cycle enhances the probability of a specific decadal NAO phase if the solar forcing is strong enough. During solar maximum, there is a tendency for a positive decadal-scale NAO and vice versa."*

*In the paragraph below (previous ll. 197), we elaborate possible reasons for the disagreement with Chiodo et al., including the different solar forcing dataset and the analysis of monthly versus winter mean fields. In a new version of the manuscript, we added figures of DJF mean fields of our model results, which only show a very weak and non-significant signal at the surface.*

L215 interestingly, the disagreement between model and observations in terms of the lag is only noted here. Could it also be that part of the signal in the observations is by chance? Could this possibility at least be listed here?

*We agree that this cannot be ruled out and we suggest to modify the sentence the following way:*

*[...] (i) that the observational record is only one ensemble member that includes all internal variability and responses to all external forcings (which may even cause what appears as a lagged response, the lag itself being by chance) [...]*

L220 the pptf technique does not really convincingly demonstrate that the potential predictability is enhanced by this much (20-25%), as the signals over wide parts of

Europe remain insignificant (Fig.1) and there is no convincing demonstration that the skill of the model is improved over the decades with a "strong solar cycle". Hence, this remains an unjustified claim rather than a science-based statement. Rather, this analysis shows that a small solar cycle signal may be present, but that an enormous amount of model data is needed to make it statistically detectable.

*We explained in more detail already where the quantitative estimate of 20-25% over the North Atlantic are to be found. We would further like to refer the reviewer to Figure S3, which does show that skill (measured by the correlation here) increases over Europe. Therefore we consider our statement very well justified. Furthermore, it is widely known and accepted in the research community on decadal climate predictions that transient simulations subject to CMIP6-historical forcing do show a high degree of predictive skill for surface air temperature stemming from the external forcing (as shown for our ensemble in Fig. S3a) over many regions of the globe. It is also a fact that this level of skill is hard to beat by actual prediction systems, the comparison to CMIP6-historical simulations is always one of the hardest tests for climate prediction systems. The fact that we can show for our model ensemble that a substantial part of this skill can be attributed to the solar cycle is anything else but irrelevant for the climate prediction research community. Furthermore, these figures are only for surface air temperature, but from the NAO analysis it is clear that SLP changes over Europe when solar forcing is active.*

Also, if we need to run a model for 1000s of years to get a solar signal, then this would rather argue against an effective usability of the solar forcing for decadal prediction. Since this study does effectively not quantify the predictability (e.g. by using prediction skill scores metrics, or similar), I urge the authors to tone down any "predictability" statements.

*We consider the statement of the reviewer regarding the relevance of our findings and an "effective usability" to be an opinion. As already mentioned above, it is standard procedure - even part of the CMIP6-DCPP protocol - to run several thousand model years to assess climate predictability and prediction skill on decadal timescales. The need for this is partly rooted in the above-mentioned so-called signal-to-noise paradox which essentially means that the real world seems to be more predictable than model simulations suggest. We also emphasize once again that we do use actual skill metrics used by the climate prediction community, the Pearson correlation that is shown in supplementary Fig. S3. We explained already that the ppvf approach as well as the analysis of the difference between two ensembles are well established and documented peer-reviewed methods in studies on climate predictability and detection and attribution. We therefore see no need to tone down our statements about predictability.*

### **References:**

Boer, G. J., and Lambert, S. J.: Multi-model decadal potential predictability of precipitation and temperature, *Geophys. Res. Lett.*, 35, L05706 (2008)

Boer, G.J. Decadal potential predictability of twenty-first century climate. *Clim Dyn* 36, 1119–1133 (2011)

Boer, G. et al.: Decadal predictability and forecast skill. *Climate Dyn.*, 41, 1817–1833 (2013)

Borchert et al.: Skillful decadal prediction of unforced southern European summer temperature variations. *Environ. Res. Lett.*, 16, 104017 (2021)

Coddington, O. et al.: A Solar Irradiance Climate Data Record. *Bull. Amer. Meteor. Soc., Bulletin of the American Meteorological Society, American Meteorological Society*, 97, 1265–1282 (2016)

Dunstone, N. J. et al. Skillful predictions of the winter North Atlantic Oscillation one year ahead. *Nature Geosci.* 9, 809–815 (2016).

Dunstone, N. J. et al. Skillful seasonal predictions of summer European rainfall. *Geophys. Res. Lett.* 45, 3246–3254 (2018).

Goddard, L. et al.: A verification framework for interannual-to-decadal predictions experiments. *Climate Dyn.*, 40, 245–272 (2013).

Hansen, F. et al.: Remote control of North Atlantic Oscillation predictability via the stratosphere. *Q.J.R. Meteorol. Soc.*, 143: 706–719 (2017)

Hu, S. & Zhou, T.: Skillful prediction of summer rainfall in the Tibetan Plateau on multiyear time scales. *Science Advances*, 7(24), eabf9395 (2021)

Kadow, C. et al.: Evaluation of forecasts by accuracy and spread in the MiKlip decadal climate prediction system. *Meteorol. Z.*, 25, 631–643 (2016)

Marsh, D.R. et al.: Climate Change from 1850 to 2005 Simulated in CESM1(WACCM). *J. Climate*, 26, 7372–7391 (2013).

Meehl, G.A. et al: Decadal Climate Prediction: An Update from the Trenches, *Bulletin of the American Meteorological Society*, 95(2), 243–267 (2014)

Murphy J.M: Assessment of the practical utility of extended range ensemble forecasts. *Q. J. R. Meteorol. Soc.* 116: 89–125 (1990)

Randall C.E. et al.: Enhanced NO<sub>x</sub> in 2006 linked to strong upper stratospheric Arctic vortex. *Geophys Res Lett*, 33, 18811 (2006)

Scaife, A. A. & Smith, D. M. A signal-to-noise paradox in climate science. *npj Climate and Atmospheric Science* 1, 28 (2018).

Smith, D.M., Scaife, A.A., Eade, R. et al. North Atlantic climate far more predictable than models imply. *Nature* 583, 796–800 (2020). <https://doi.org/10.1038/s41586-020-2525-0>.

*Smith D.M. et al.: Robust skill of decadal climate predictions. npj Climate and Atmospheric Science, 2, 13 (2019)*

*Tian, T., et al.: Benefits of sea ice initialization for the interannual-to-decadal climate prediction skill in the Arctic in EC-Earth3, Geosci. Model Dev., 14, 4283–4305 (2021)*

*Xu, L. et al.: Potential precipitation predictability decreases under future warming. Geophysical Research Letters, 47, e2020GL090798 (2020)*

*Yeo, K. L. et al.: Reconstruction of total and spectral solar irradiance from 1974 to 2013 based on KPVT, SoHO/MDI, and SDO/HMI observations. Astron. Astrophys., 570, A85 (2014)*
